# Supplementary material
Source: PubMed Central journal article supplement (PMC2141805)

**Arg123**

**Arg156**

**Arg36**

**Arg167**

**AP<sub>5</sub>A**

C $\epsilon$   
N $\epsilon$   
C $\gamma$   
C $\delta$

**Arg88**

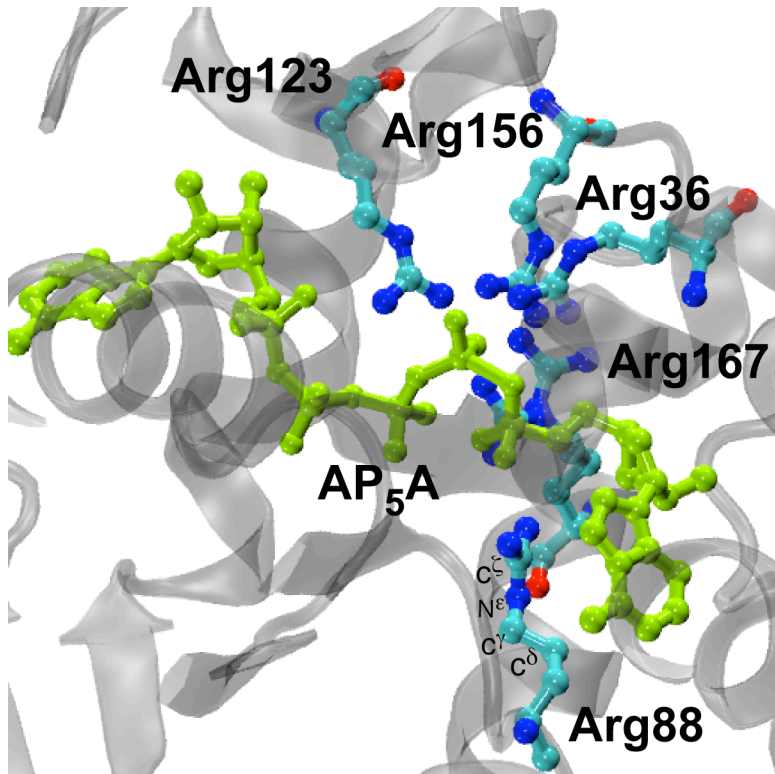

Supplement: pnas_0706443104_1.pdf [file pnas_0706443104_1.pdf]

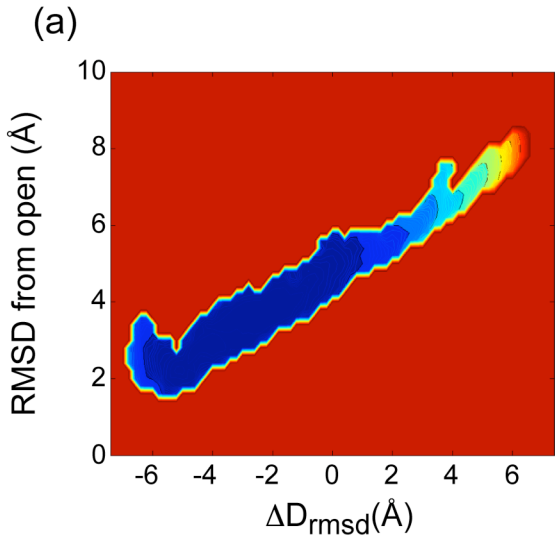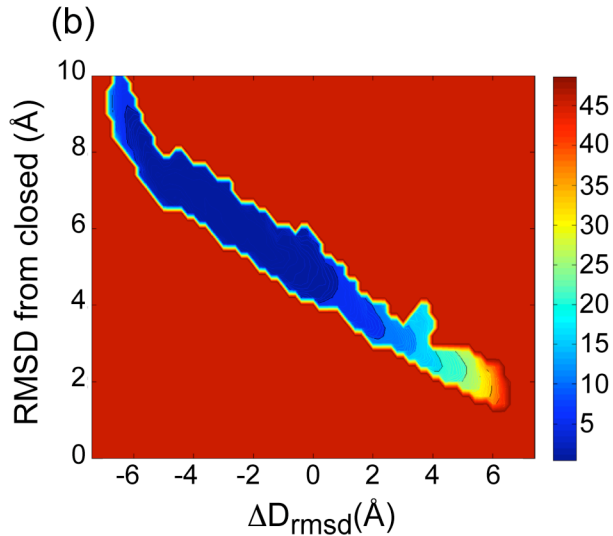

Supplement: pnas_0706443104_2.pdf [file pnas_0706443104_2.pdf]

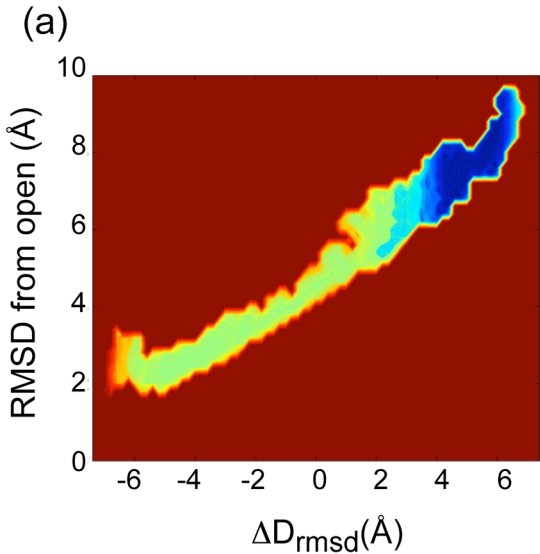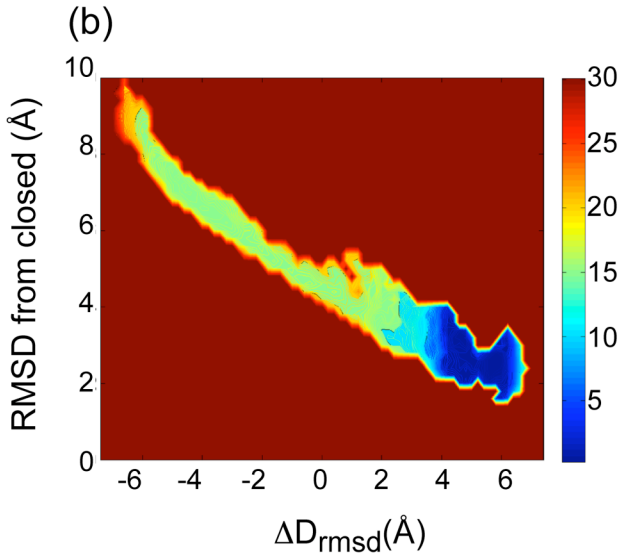

Supplement: pnas_0706443104_3.pdf [file pnas_0706443104_3.pdf]
